# Supplementary material for: mTORC1-Dependent Protein and Parkinson’s Disease: A Mendelian Randomization Study
Source: MDPI journal article supplement (doi:10.3390/brainsci13040536), 2023-03-24
Supplement: s1 [file s1]

## Article

# mTORC1-dependent protein and Parkinson's disease: A Mendelian randomization study

**Table S1.** The instrumental variables associated with exposure.

| Exposure       | SNP         | Effect allele | Other allele | Beta.exposure | Beta.outcome | Se.exposure | Se.outcome |
|----------------|-------------|---------------|--------------|---------------|--------------|-------------|------------|
| <b>RPS6K</b>   | rs1355191   | C             | T            | 0.125         | −0.0263      | 0.0263      | 0.0229     |
|                | rs1381968   | T             | C            | 0.3462        | 0.0871       | 0.0746      | 0.0711     |
|                | rs138831183 | G             | A            | −0.5177       | 0.151        | 0.1074      | 0.1384     |
|                | rs148800371 | T             | G            | 0.1637        | 0.0711       | 0.0327      | 0.0356     |
|                | rs148897689 | G             | A            | −0.4496       | 0.0266       | 0.0943      | 0.0968     |
|                | rs35747952  | T             | C            | 0.3736        | −0.0042      | 0.0809      | 0.0744     |
|                | rs3859503   | A             | C            | −0.1892       | 0.044        | 0.0333      | 0.0322     |
|                | rs58565824  | C             | T            | −0.4607       | 0.1101       | 0.0937      | 0.0875     |
|                | rs62143197  | G             | A            | −0.5347       | 0.0182       | 0.029       | 0.022      |
|                | rs62398809  | A             | G            | 0.1129        | 4.00E−04     | 0.0247      | 0.0224     |
|                | rs7017005   | A             | G            | 0.1213        | −0.0099      | 0.0256      | 0.0227     |
|                | rs72881486  | G             | A            | −0.3633       | 0.0371       | 0.0745      | 0.0785     |
|                | rs75688971  | T             | C            | −0.4179       | 0.0505       | 0.0836      | 0.0899     |
|                | rs77394885  | A             | C            | −0.5291       | −0.0063      | 0.1122      | 0.0986     |
|                | rs79777011  | C             | A            | −0.1634       | −0.0358      | 0.0346      | 0.0312     |
|                | rs9833044   | C             | T            | 0.319         | 0.0833       | 0.0635      | 0.0603     |
| <b>EIF4EBP</b> | rs113664570 | C             | T            | −0.2666       | −0.0281      | 0.0584      | 0.0741     |
|                | rs17003636  | T             | C            | −0.4607       | 0.1179       | 0.0984      | 0.0944     |
|                | rs72743058  | G             | A            | 0.3839        | 0.0308       | 0.0827      | 0.1086     |
|                | rs76802510  | C             | T            | 0.2684        | −0.0565      | 0.0496      | 0.0424     |
|                | rs79613514  | T             | C            | −0.3407       | 0.1149       | 0.0738      | 0.0566     |
|                | rs79943794  | C             | T            | 0.357         | −0.1534      | 0.0766      | 0.0658     |
| <b>EIF4A</b>   | rs11084300  | C             | T            | −0.1431       | 0.0085       | 0.0272      | 0.0302     |
|                | rs1447676   | C             | T            | 0.1182        | 0.0371       | 0.0257      | 0.0229     |
|                | rs145852535 | A             | G            | −0.521        | −0.032       | 0.1118      | 0.1932     |
|                | rs1931094   | G             | A            | −0.1163       | 0.0021       | 0.0253      | 0.0201     |
|                | rs2462049   | G             | T            | −0.1159       | −0.0068      | 0.0249      | 0.0225     |
|                | rs34131899  | G             | A            | 0.2829        | 0.0053       | 0.0591      | 0.0514     |
|                | rs34436714  | C             | A            | −0.4687       | 0.0203       | 0.0291      | 0.0214     |
|                | rs3859507   | G             | T            | −0.1777       | 0.0394       | 0.0327      | 0.0313     |
|                | rs6792693   | A             | G            | −0.134        | −0.0255      | 0.0286      | 0.0203     |
|                | rs74512707  | G             | A            | −0.1785       | −0.0304      | 0.0385      | 0.0344     |
| <b>EIF4E</b>   | rs11084300  | C             | T            | −0.1585       | 0.0085       | 0.0272      | 0.0302     |
|                | rs116934738 | T             | C            | −0.3758       | −0.0392      | 0.077       | 0.0784     |

|       |             |   |   |         |         |        |        |
|-------|-------------|---|---|---------|---------|--------|--------|
|       | rs138236097 | G | A | 0.2673  | −0.0639 | 0.0583 | 0.0556 |
|       | rs142569846 | G | T | −0.2303 | −0.0429 | 0.0468 | 0.0429 |
|       | rs149036167 | T | C | 0.5168  | −0.1404 | 0.108  | 0.1165 |
|       | rs192028145 | A | G | 0.5295  | −0.1454 | 0.1025 | 0.1056 |
|       | rs192206210 | T | G | −0.5846 | −0.1307 | 0.1211 | 0.1213 |
|       | rs2209485   | C | T | −0.1637 | 0.0574  | 0.034  | 0.0321 |
|       | rs62130614  | G | T | −0.4606 | −0.1956 | 0.0999 | 0.0912 |
|       | rs62143198  | G | A | −0.4669 | 0.019   | 0.0296 | 0.022  |
|       | rs741454    | T | C | −0.1426 | 0.0132  | 0.031  | 0.0281 |
|       | rs74842834  | G | T | −0.4443 | −0.0238 | 0.0947 | 0.0949 |
|       | rs76641346  | G | T | −0.3052 | −0.0126 | 0.063  | 0.0625 |
| EIF4G | rs112309230 | T | C | 0.5745  | −0.0404 | 0.1158 | 0.1273 |
|       | rs140388345 | G | A | −0.559  | 0.2141  | 0.1201 | 0.132  |
|       | rs1411879   | G | A | −0.4092 | 0.0544  | 0.089  | 0.0825 |
|       | rs142978915 | T | C | 0.4055  | −0.0701 | 0.0885 | 0.0757 |
|       | rs143862167 | C | T | 0.204   | −0.0626 | 0.044  | 0.0342 |
|       | rs704       | G | A | −0.1618 | 0.0089  | 0.0245 | 0.0176 |
|       | rs7955609   | G | A | −0.1251 | 0.0278  | 0.0263 | 0.0239 |
